# Supplementary material for: Transancestral mapping of the MHC region in systemic lupus erythematosus identifies new independent and interacting loci at MSH5, HLA-DPB1 and HLA-G
Source: PubMed Central journal article supplement — Ann Rheum Dis. 2012 Jan 10;71(5):777–84. doi: 10.1136/annrheumdis-2011-200808 (PMC3329227; doi:10.1136/annrheumdis-2011-200808), 2012-01-10
Supplement: ard-71-5-0777-s1.pdf [file ard-71-5-0777-s1.pdf]

## Supplementary Information

### Trans-ancestral mapping of the MHC region in SLE identifies new independent and interacting loci at *MSH5*, *HLA-DPB1* and *HLA-G*

#### Supplementary Methods

##### Custom iSelect SNP selection

The MHC region SNPs were chosen according to the following criteria: all SNPs put forward were required to have an Illumina designability score  $>0.8$ . All Illumina MHC-Panel SNPs were chosen (~2,360). Additional SNPs were selected from [1] and [2]. Further SNPs were added from HapMap Phase II. In this latter dataset there are 7,574 SNPs that are both designable (score $>0.8$ ) and common (minor allele frequency, MAF $>5\%$ ) in any population. SNPs were included if they were (i) not picked in the above steps, (ii) not in perfect linkage disequilibrium (LD) with any SNP from the above steps and (iii) not in perfect LD with any other picked SNP (LD estimates across CEU, YRI and CHB+JPT). To resolve the phase, haplotypes from the HapMap website were used. Only SNPs with designability-score  $\geq 1.0$  were allowed to tag other SNPs. SNPs identified from the resequencing of eight homozygous MHC haplotypes were also included [3]. From the 37,535 SNPs called between the eight haplotypes, 11,112 were designable and had their minor allele on at least two haplotypes. From these, a set 309 SNPs were not in perfect LD (on the eight haplotypes) with any HapMap SNP or another SNP from the resequencing project and were added to the dataset. Owing to the small sample size, there will be many false positive instances of perfect LD. To account for this, coding SNPs and SNPs in recombination hotspots were also added.

**Supplementary Table 1:** Single marker association analysis in Spanish SLE cohort (SNPs with  $p < 10^{-5}$ )

| MARKER           | BP              | A1       | OR          | L95         | U95         | P               |
|------------------|-----------------|----------|-------------|-------------|-------------|-----------------|
| RS9268832        | 32535767        | A        | 1.80        | 1.45        | 2.23        | 7.64E-08        |
| RS1150758        | 32136127        | C        | 2.61        | 1.81        | 3.78        | 3.34E-07        |
| RS3117213        | 33172583        | A        | 1.86        | 1.46        | 2.35        | 3.55E-07        |
| <b>RS3130490</b> | <b>31847099</b> | <b>A</b> | <b>2.96</b> | <b>1.95</b> | <b>4.51</b> | <b>3.94E-07</b> |
| RS7195           | 32520517        | A        | 1.75        | 1.41        | 2.17        | 3.96E-07        |
| RS2213586        | 32521072        | A        | 1.75        | 1.41        | 2.17        | 3.96E-07        |
| RS9277545        | 33163301        | A        | 1.86        | 1.46        | 2.37        | 4.42E-07        |
| RS3117231        | 33182886        | G        | 1.85        | 1.46        | 2.36        | 4.54E-07        |
| RS1150755        | 32146528        | A        | 2.58        | 1.79        | 3.73        | 4.71E-07        |
| RS2395314        | 33170651        | A        | 1.86        | 1.46        | 2.36        | 4.78E-07        |
| RS3131379        | 31829012        | A        | 2.87        | 1.90        | 4.32        | 5.13E-07        |
| RS3117574        | 31833209        | A        | 2.87        | 1.90        | 4.32        | 5.13E-07        |
| RS3763327        | 32521808        | G        | 1.73        | 1.39        | 2.14        | 5.79E-07        |
| RS3131381        | 31816442        | A        | 2.85        | 1.89        | 4.30        | 5.87E-07        |
| RS2227139        | 32521437        | G        | 1.73        | 1.40        | 2.15        | 5.96E-07        |
| RS7194           | 32520458        | G        | 1.72        | 1.39        | 2.14        | 7.14E-07        |
| RS2213585        | 32521128        | G        | 1.72        | 1.39        | 2.14        | 7.14E-07        |
| RS1270942        | 32026839        | G        | 2.83        | 1.87        | 4.26        | 7.38E-07        |
| RS389884         | 32048876        | G        | 2.83        | 1.87        | 4.26        | 7.38E-07        |
| RS3130288        | 32203979        | A        | 2.82        | 1.87        | 4.26        | 7.46E-07        |
| RS3128972        | 33166752        | G        | 1.83        | 1.44        | 2.32        | 7.59E-07        |
| RS3130212        | 33182367        | C        | 1.87        | 1.46        | 2.40        | 7.72E-07        |
| RS9277555        | 33163583        | A        | 1.83        | 1.44        | 2.33        | 7.87E-07        |
| RS8084           | 32519013        | A        | 1.70        | 1.38        | 2.10        | 8.45E-07        |
| RS3117222        | 33168927        | A        | 1.82        | 1.43        | 2.31        | 8.62E-07        |
| RS3130320        | 32331236        | A        | 1.76        | 1.41        | 2.21        | 9.59E-07        |
| RS2179919        | 33167240        | G        | 1.82        | 1.43        | 2.30        | 9.72E-07        |
| RS3128919        | 33169604        | A        | 1.81        | 1.43        | 2.30        | 9.78E-07        |
| RS558702         | 31978305        | A        | 2.79        | 1.85        | 4.20        | 1.06E-06        |
| RS497309         | 32000463        | C        | 2.79        | 1.85        | 4.20        | 1.06E-06        |
| RS3117577        | 31835453        | G        | 2.78        | 1.84        | 4.20        | 1.08E-06        |
| RS3091284        | 33165222        | C        | 1.82        | 1.43        | 2.32        | 1.25E-06        |
| RS3130455        | 31233957        | T        | 1.99        | 1.51        | 2.63        | 1.30E-06        |
| RS130065         | 31230479        | A        | 1.93        | 1.48        | 2.52        | 1.31E-06        |
| RS3130679        | 31915519        | G        | 2.76        | 1.83        | 4.17        | 1.35E-06        |
| RS3117234        | 33181962        | G        | 1.83        | 1.43        | 2.35        | 1.39E-06        |
| RS519417         | 31986412        | A        | 2.74        | 1.82        | 4.12        | 1.46E-06        |
| RS3117226        | 33165637        | A        | 1.83        | 1.43        | 2.34        | 1.49E-06        |
| RS3094662        | 31229924        | C        | 1.98        | 1.50        | 2.61        | 1.63E-06        |
| RS3130191        | 33169849        | G        | 1.79        | 1.41        | 2.28        | 1.64E-06        |
| RS3134942        | 32276749        | A        | 2.39        | 1.67        | 3.42        | 1.66E-06        |
| RS3132956        | 32287416        | A        | 2.39        | 1.67        | 3.42        | 1.66E-06        |

|                   |                 |          |             |             |             |                 |
|-------------------|-----------------|----------|-------------|-------------|-------------|-----------------|
| RS1269852         | 32188169        | C        | 2.76        | 1.82        | 4.20        | 2.02E-06        |
| RS6899657         | 33158201        | A        | 1.79        | 1.41        | 2.27        | 2.07E-06        |
| RS3132450         | 31704117        | G        | 2.66        | 1.77        | 4.00        | 2.54E-06        |
| RS3115572         | 32328462        | C        | 1.67        | 1.35        | 2.07        | 2.64E-06        |
| RS3131296         | 32280971        | A        | 2.35        | 1.65        | 3.36        | 2.65E-06        |
| RS130076          | 31230461        | A        | 1.96        | 1.48        | 2.60        | 2.66E-06        |
| RS1367730         | 33166092        | A        | 1.79        | 1.40        | 2.28        | 2.75E-06        |
| RS1265181         | 31263764        | G        | 2.00        | 1.50        | 2.68        | 2.90E-06        |
| RS1265178         | 31269208        | A        | 2.00        | 1.50        | 2.68        | 2.90E-06        |
| RS3117223         | 33168042        | A        | 1.77        | 1.39        | 2.24        | 3.30E-06        |
| RS6936204         | 32325070        | A        | 1.72        | 1.37        | 2.17        | 3.44E-06        |
| RS3134796         | 32297899        | G        | 2.27        | 1.61        | 3.21        | 3.55E-06        |
| RS3130210         | 33180707        | A        | 1.80        | 1.40        | 2.31        | 3.72E-06        |
| RS910051          | 32423489        | C        | 2.55        | 1.71        | 3.79        | 4.24E-06        |
| RS3129927         | 32441805        | C        | 2.55        | 1.71        | 3.79        | 4.24E-06        |
| RS9268165         | 32380305        | G        | 1.89        | 1.44        | 2.48        | 4.63E-06        |
| RS2523544         | 31441541        | A        | 2.02        | 1.49        | 2.72        | 4.71E-06        |
| RS1794282         | 32774504        | A        | 2.51        | 1.69        | 3.73        | 4.73E-06        |
| RS3129890         | 32522251        | G        | 1.75        | 1.38        | 2.23        | 5.02E-06        |
| RS3129950         | 32466179        | C        | 2.43        | 1.66        | 3.55        | 5.03E-06        |
| RS2395149         | 32433540        | A        | 2.52        | 1.69        | 3.76        | 5.47E-06        |
| RS7775397         | 32369230        | C        | 2.51        | 1.69        | 3.75        | 5.81E-06        |
| RS9268235         | 32398186        | A        | 2.51        | 1.69        | 3.75        | 5.81E-06        |
| RS1265757         | 32410360        | A        | 2.51        | 1.69        | 3.75        | 5.81E-06        |
| RS9268208         | 32388569        | G        | 2.61        | 1.72        | 3.95        | 6.22E-06        |
| RS2064478         | 33180244        | A        | 1.76        | 1.38        | 2.25        | 6.61E-06        |
| RS3130614         | 31584437        | A        | 2.54        | 1.69        | 3.82        | 7.79E-06        |
| RS3129962         | 32487361        | A        | 2.46        | 1.66        | 3.65        | 8.11E-06        |
| RS9268212         | 32389867        | G        | 1.88        | 1.43        | 2.49        | 8.25E-06        |
| RS1018433         | 32389488        | A        | 1.86        | 1.41        | 2.44        | 8.71E-06        |
| <b>DRB1_[301]</b> | <b>32600002</b> | <b>C</b> | <b>1.88</b> | <b>1.42</b> | <b>2.48</b> | <b>9.39E-06</b> |
| RS409558          | 31816126        | G        | 0.53        | 0.40        | 0.71        | 1.07E-05        |
| RS2293861         | 31819103        | A        | 0.53        | 0.40        | 0.71        | 1.07E-05        |
| RS2075788         | 31820160        | C        | 0.53        | 0.40        | 0.71        | 1.07E-05        |
| RS3828922         | 31821433        | A        | 0.53        | 0.40        | 0.71        | 1.07E-05        |
| RS3864299         | 32379652        | T        | 1.84        | 1.40        | 2.41        | 1.13E-05        |
| RS9268213         | 32390059        | G        | 1.84        | 1.40        | 2.41        | 1.13E-05        |
| RS6909790         | 32390957        | G        | 1.84        | 1.40        | 2.41        | 1.13E-05        |
| RS6915455         | 32391472        | A        | 1.84        | 1.40        | 2.41        | 1.13E-05        |
| RS9268215         | 32390449        | G        | 1.83        | 1.40        | 2.40        | 1.21E-05        |
| RS3117230         | 33183613        | G        | 1.77        | 1.37        | 2.29        | 1.27E-05        |
| RS3821236         | 191611003       | A        | 1.69        | 1.34        | 2.15        | 1.32E-05        |
| RS2075801         | 31836246        | A        | 0.54        | 0.40        | 0.71        | 1.34E-05        |
| RS1548306         | 32535157        | T        | 1.57        | 1.28        | 1.93        | 1.36E-05        |
| RS1986997         | 31336389        | A        | 1.66        | 1.32        | 2.09        | 1.39E-05        |
| RS9276447         | 32823547        | C        | 1.60        | 1.29        | 1.98        | 1.51E-05        |

|           |           |   |      |      |      |          |
|-----------|-----------|---|------|------|------|----------|
| RS2143462 | 32443182  | A | 1.90 | 1.42 | 2.54 | 1.52E-05 |
| RS2179920 | 33166852  | A | 1.76 | 1.36 | 2.28 | 1.52E-05 |
| RS4947350 | 32875598  | G | 1.82 | 1.39 | 2.39 | 1.52E-05 |
| RS7341328 | 32383172  | A | 1.83 | 1.39 | 2.40 | 1.55E-05 |
| RS9268200 | 32386648  | A | 1.82 | 1.39 | 2.38 | 1.58E-05 |
| RS9268168 | 32380488  | A | 1.82 | 1.39 | 2.39 | 1.59E-05 |
| RS9268192 | 32385189  | A | 1.82 | 1.39 | 2.39 | 1.63E-05 |
| RS6934546 | 32387930  | G | 1.81 | 1.38 | 2.37 | 1.64E-05 |
| RS3132931 | 32343873  | C | 1.82 | 1.39 | 2.40 | 1.84E-05 |
| RS9268137 | 32363247  | A | 1.82 | 1.39 | 2.40 | 1.84E-05 |
| RS9268176 | 32382057  | A | 1.82 | 1.39 | 2.40 | 1.84E-05 |
| RS6934776 | 32387794  | A | 1.82 | 1.39 | 2.40 | 1.84E-05 |
| RS9275602 | 32790790  | A | 2.03 | 1.47 | 2.81 | 1.85E-05 |
| RS7742654 | 32379421  | G | 1.83 | 1.39 | 2.42 | 1.85E-05 |
| RS7775332 | 32378341  | A | 1.78 | 1.37 | 2.33 | 2.03E-05 |
| RS9277385 | 33158451  | G | 1.67 | 1.32 | 2.11 | 2.09E-05 |
| RS3115560 | 32344120  | A | 1.78 | 1.36 | 2.32 | 2.10E-05 |
| RS3096673 | 32345991  | G | 1.78 | 1.36 | 2.32 | 2.10E-05 |
| RS3115553 | 32353805  | A | 1.78 | 1.36 | 2.32 | 2.10E-05 |
| RS1264372 | 30877705  | A | 1.96 | 1.44 | 2.67 | 2.13E-05 |
| RS652888  | 31959213  | G | 1.69 | 1.33 | 2.16 | 2.26E-05 |
| RS3129768 | 32703061  | C | 1.82 | 1.38 | 2.40 | 2.37E-05 |
| RS6909427 | 32376679  | C | 1.77 | 1.36 | 2.31 | 2.47E-05 |
| RS1018430 | 32389666  | A | 1.77 | 1.36 | 2.31 | 2.48E-05 |
| RS9268198 | 32386165  | A | 1.80 | 1.37 | 2.36 | 2.50E-05 |
| RS3115563 | 32341616  | A | 1.77 | 1.36 | 2.31 | 2.54E-05 |
| RS3864302 | 32386770  | A | 1.77 | 1.36 | 2.31 | 2.64E-05 |
| RS1059615 | 32657541  | A | 1.84 | 1.38 | 2.44 | 2.71E-05 |
| RS3099844 | 31556955  | A | 2.12 | 1.49 | 3.01 | 2.75E-05 |
| RS2734583 | 31613459  | G | 2.29 | 1.56 | 3.38 | 2.85E-05 |
| RS9277366 | 33158085  | A | 1.60 | 1.29 | 2.00 | 2.86E-05 |
| RS9268167 | 32380415  | A | 1.77 | 1.35 | 2.30 | 2.92E-05 |
| RS3024886 | 191608694 | A | 1.66 | 1.31 | 2.11 | 2.98E-05 |
| RS9268861 | 32537872  | A | 1.71 | 1.33 | 2.19 | 3.03E-05 |
| RS7762279 | 32863268  | G | 2.22 | 1.52 | 3.22 | 3.07E-05 |
| RS3130557 | 31202682  | A | 2.18 | 1.51 | 3.15 | 3.21E-05 |
| RS6457499 | 32306926  | G | 0.65 | 0.53 | 0.80 | 3.28E-05 |
| RS9267488 | 31622226  | G | 2.29 | 1.55 | 3.38 | 3.36E-05 |
| RS3129924 | 32441277  | A | 1.87 | 1.39 | 2.52 | 3.42E-05 |
| RS3129925 | 32441397  | A | 1.87 | 1.39 | 2.52 | 3.42E-05 |
| RS2143461 | 32443325  | A | 1.87 | 1.39 | 2.52 | 3.42E-05 |
| RS3129937 | 32444342  | A | 1.87 | 1.39 | 2.52 | 3.42E-05 |
| RS7750783 | 32376058  | A | 1.78 | 1.35 | 2.33 | 3.49E-05 |
| RS2524054 | 31360375  | A | 1.76 | 1.35 | 2.29 | 3.55E-05 |
| RS2647044 | 32775888  | A | 1.66 | 1.31 | 2.11 | 3.56E-05 |
| RS9268177 | 32382860  | A | 2.35 | 1.57 | 3.52 | 3.67E-05 |

|            |          |   |      |      |      |          |
|------------|----------|---|------|------|------|----------|
| RS2213567  | 32819633 | C | 1.55 | 1.26 | 1.90 | 4.14E-05 |
| RS3129939  | 32444744 | G | 1.86 | 1.38 | 2.50 | 4.15E-05 |
| RS2239803  | 32519811 | G | 1.52 | 1.24 | 1.85 | 4.20E-05 |
| RS2844559  | 31448054 | A | 2.14 | 1.49 | 3.08 | 4.25E-05 |
| RS9276731  | 32873563 | A | 2.20 | 1.51 | 3.20 | 4.27E-05 |
| RS9276430  | 32820160 | A | 1.55 | 1.26 | 1.91 | 4.32E-05 |
| RS3130349  | 32255674 | A | 1.83 | 1.37 | 2.45 | 4.39E-05 |
| RS3134940  | 32257794 | G | 1.83 | 1.37 | 2.45 | 4.39E-05 |
| RS3129926  | 32441458 | G | 1.86 | 1.38 | 2.50 | 4.43E-05 |
| RS2856674  | 32767623 | G | 1.77 | 1.34 | 2.33 | 4.89E-05 |
| RS9268197  | 32385912 | A | 1.78 | 1.35 | 2.35 | 5.24E-05 |
| RS3134608  | 32225949 | C | 1.70 | 1.31 | 2.20 | 5.68E-05 |
| RS1793891  | 31329677 | A | 1.62 | 1.28 | 2.05 | 5.80E-05 |
| RS440454   | 32035321 | A | 1.63 | 1.28 | 2.06 | 5.96E-05 |
| RS419788   | 32036778 | A | 1.63 | 1.28 | 2.06 | 5.96E-05 |
| RS9277565  | 33164875 | A | 1.72 | 1.32 | 2.25 | 6.29E-05 |
| RS9277567  | 33164991 | C | 1.72 | 1.32 | 2.25 | 6.29E-05 |
| RS931      | 33162528 | A | 1.56 | 1.25 | 1.94 | 6.53E-05 |
| RS2064476  | 33181300 | G | 1.55 | 1.25 | 1.93 | 6.61E-05 |
| RS2523554  | 31439808 | G | 1.60 | 1.27 | 2.01 | 6.87E-05 |
| RS6911419  | 32517765 | A | 1.50 | 1.23 | 1.84 | 6.96E-05 |
| RS2239804  | 32519501 | A | 1.50 | 1.23 | 1.84 | 6.96E-05 |
| RS3097652  | 33165813 | A | 1.56 | 1.25 | 1.94 | 7.31E-05 |
| RS1960278  | 31377853 | C | 1.51 | 1.23 | 1.84 | 7.36E-05 |
| RS11860650 | 31234207 | A | 1.65 | 1.29 | 2.11 | 7.55E-05 |
| RS3130985  | 31193335 | A | 2.07 | 1.44 | 2.96 | 7.90E-05 |
| RS9268220  | 32392318 | A | 1.84 | 1.36 | 2.50 | 7.93E-05 |
| RS1264326  | 30959888 | A | 2.40 | 1.55 | 3.71 | 7.95E-05 |
| RS4143332  | 31456344 | A | 2.13 | 1.46 | 3.11 | 8.06E-05 |
| RS2844531  | 31461150 | G | 2.13 | 1.46 | 3.11 | 8.06E-05 |
| RS6931646  | 32517759 | G | 1.50 | 1.23 | 1.83 | 8.27E-05 |
| RS9268658  | 32518694 | G | 1.50 | 1.23 | 1.83 | 8.31E-05 |
| RS3131788  | 31132775 | A | 2.05 | 1.43 | 2.94 | 8.41E-05 |
| RS630379   | 32030233 | A | 1.64 | 1.28 | 2.10 | 8.45E-05 |
| RS9268127  | 32361537 | G | 1.84 | 1.36 | 2.50 | 8.54E-05 |
| RS9276435  | 32821845 | A | 1.73 | 1.32 | 2.27 | 8.58E-05 |
| RS3117225  | 33165689 | A | 1.55 | 1.25 | 1.93 | 8.59E-05 |
| RS2858331  | 32789255 | G | 0.67 | 0.55 | 0.82 | 8.74E-05 |
| RS3130562  | 31208953 | G | 2.08 | 1.44 | 3.00 | 8.87E-05 |
| RS9277394  | 33158948 | A | 1.54 | 1.24 | 1.91 | 9.35E-05 |
| RS9277378  | 33158257 | G | 1.55 | 1.24 | 1.93 | 9.45E-05 |
| RS9277393  | 33158855 | G | 1.54 | 1.24 | 1.91 | 9.49E-05 |
| RS1042544  | 33162435 | G | 1.54 | 1.24 | 1.91 | 9.49E-05 |
| RS9277542  | 33163225 | G | 1.54 | 1.24 | 1.91 | 9.49E-05 |
| RS3117228  | 33164413 | A | 1.54 | 1.24 | 1.91 | 9.49E-05 |
| RS3130188  | 33165154 | G | 1.54 | 1.24 | 1.91 | 9.49E-05 |

|           |          |   |      |      |      |          |
|-----------|----------|---|------|------|------|----------|
| RS9277386 | 33158477 | G | 1.54 | 1.24 | 1.92 | 9.57E-05 |
| RS3129933 | 32444139 | A | 1.83 | 1.35 | 2.48 | 9.70E-05 |
| RS9276689 | 32859940 | A | 2.24 | 1.49 | 3.36 | 9.70E-05 |
| RS3134931 | 32298598 | G | 0.66 | 0.54 | 0.81 | 9.81E-05 |

---

**Supplementary Figure 1: Linkage disequilibrium between top independent MHC SNPs and *HLA-DRB1* alleles in Spanish controls**

(a)  $D'$  plot

(b)  $r^2$  plot

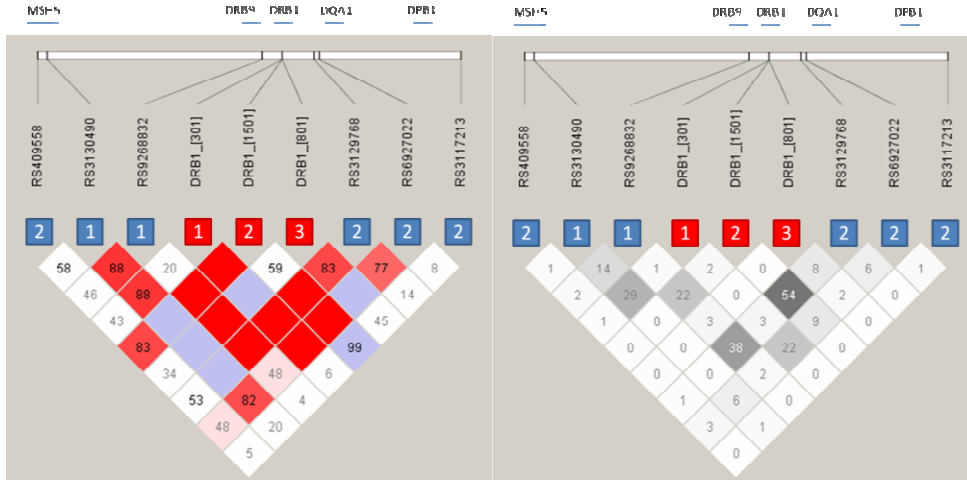

Approximate location of MHC region genes is shown above the plots. SNPs and HLA allele positions are shown to scale. Numbers in boxes denote SNP (blue) and *HLA-DRB1* allele (red) primary (1) and secondary (2-3) signals. Numbers in diamonds denote  $D'$  and  $r^2$  values respectively.

**Supplementary Figure 2: Linkage disequilibrium between top independent MHC SNPs and *HLA-DRB1* alleles in United Kingdom controls**

(a)  $D'$  plot

(b)  $r^2$  plot

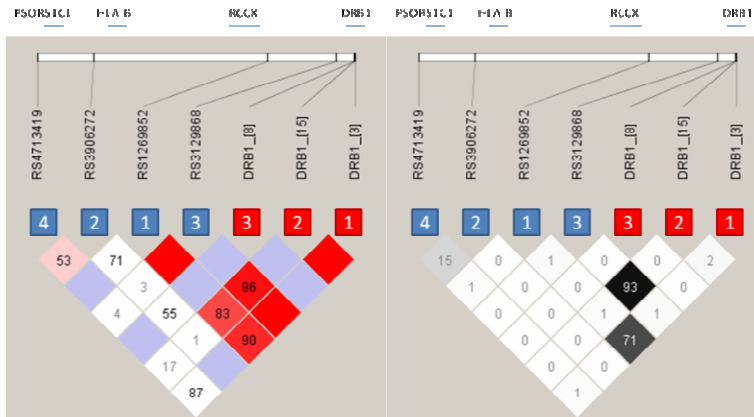

**Supplementary Table 2:** *HLA-DRB1* association in Spanish SLE using step-wise conditional logistic regression to assess relative predispositional effects

| SNP ID             | Position        | F_U         | OR (95% CI)             | P                           | Other disease  |
|--------------------|-----------------|-------------|-------------------------|-----------------------------|----------------|
| <b>Spanish SLE</b> |                 |             |                         |                             |                |
| DRB1*03:01         | 32600000        | 0.12        | 1.88 (1.43-2.48)        | 5.53x10 <sup>-6</sup>       | many           |
| <i>DRB1*15:01</i>  | <i>32600000</i> | <i>0.09</i> | <i>1.82 (1.30-2.54)</i> | <i>5.00x10<sup>-4</sup></i> | <i>MS, T1D</i> |
| <i>DRB1*08:01</i>  | <i>32600000</i> | <i>0.01</i> | <i>3.67 (1.60-8.38)</i> | <i>0.0021</i>               |                |

Conditional association results are italicised; F\_U, frequency in unaffected controls; OR, odds ratio; CI, confidence interval; p, p value (see Methods); MS, multiple sclerosis; T1D, type 1 diabetes.

SLR analyses at the *HLA-DRB1* locus in Spanish SLE reveal significant predisposing effects for the alleles, *HLA-DRB1\*03:01*, *HLA-DRB1\*15:01* and *HLA-DRB1\*08:01*. These data contrast with those of northern European lupus cohorts where *HLA-DRB1\*08:01* is uncommon and not associated with SLE [4-5]. However, the *HLA-DRB1\*08:01-DQB1\*0401* haplotype, inferred using microsatellite markers, was found to be associated with SLE in a previous European-American study. The current data suggest that this association is most likely due to a southern European component within the European-American cohort [6].



**Supplementary Table 3:** SNP associations following stepwise logistic regression using PC1, *HLA-DRB1\*03:01*, *HLA-DRB1\*15:01*, *HLA-DRB1\*08:01* as covariates in Spanish SLE

| MARKER    | BP       | A1 | OR   | L95  | U95  | P        |
|-----------|----------|----|------|------|------|----------|
| RS3117213 | 33172583 | A  | 1.81 | 1.42 | 2.31 | 2.28E-06 |
| RS409558  | 31816126 | G  | 0.55 | 0.41 | 0.73 | 5.31E-05 |
| RS3130490 | 31847099 | A  | 2.28 | 1.38 | 3.77 | 1.26E-03 |
| RS9268832 | 32535767 | A  | 1.48 | 1.14 | 1.92 | 3.32E-03 |
| RS3129768 | 32703061 | C  | 1.72 | 1.08 | 2.74 | 2.22E-02 |

**Supplementary Table 4:** SNP associations following stepwise logistic regression using PC1, *HLA-DRB1\*03:01*, *HLA-DRB1\*15:01* as covariates in United Kingdom SLE

| MARKER    | BP       | A1 | OR   | L95  | U95  | P        |
|-----------|----------|----|------|------|------|----------|
| RS3906272 | 31370903 | A  | 3.01 | 2.70 | 3.32 | 3.25E-12 |
| RS4713419 | 31101215 | C  | 0.53 | 0.18 | 0.88 | 3.47E-04 |
| RS1269852 | 32188169 | C  | 1.66 | 1.25 | 2.07 | 1.65E-02 |
| RS3129868 | 32512355 | T  | 1.17 | 0.15 | 2.20 | 7.57E-01 |

**Supplementary Table 5:** Single marker association analysis in Filipino SLE cohort (SNPs with  $p < 10^{-5}$ )

| MARKER    | BP       | A1 | OR   | L95  | U95  | P        |
|-----------|----------|----|------|------|------|----------|
| RS9271366 | 32694832 | G  | 2.46 | 1.83 | 3.30 | 1.97E-09 |
| RS1966002 | 32689662 | C  | 0.42 | 0.31 | 0.55 | 2.27E-09 |
| RS9270986 | 32682038 | C  | 0.42 | 0.31 | 0.56 | 2.96E-09 |
| RS615672  | 32682149 | C  | 0.41 | 0.30 | 0.55 | 5.66E-09 |
| RS2858867 | 32683303 | G  | 0.41 | 0.31 | 0.56 | 1.01E-08 |
| RS2071351 | 33151908 | A  | 0.32 | 0.20 | 0.52 | 3.21E-06 |
| RS984778  | 32508066 | A  | 0.52 | 0.39 | 0.69 | 3.89E-06 |
| RS3135338 | 32509195 | A  | 0.52 | 0.39 | 0.69 | 4.52E-06 |
| RS3135395 | 32513170 | C  | 0.52 | 0.40 | 0.69 | 5.01E-06 |
| RS2395173 | 32512837 | G  | 0.52 | 0.40 | 0.69 | 5.04E-06 |
| RS9258738 | 29935369 | A  | 0.44 | 0.31 | 0.63 | 6.37E-06 |
| RS2523767 | 29920786 | A  | 0.45 | 0.32 | 0.64 | 8.17E-06 |
| RS3129768 | 32703061 | A  | 0.53 | 0.40 | 0.71 | 1.31E-05 |
| RS9501624 | 32507264 | G  | 3.26 | 1.91 | 5.56 | 1.40E-05 |
| RS6457656 | 32844956 | A  | 0.37 | 0.23 | 0.58 | 1.58E-05 |
| RS9501259 | 33163529 | G  | 0.55 | 0.41 | 0.72 | 1.96E-05 |
| RS3129878 | 32516713 | C  | 0.49 | 0.35 | 0.68 | 2.10E-05 |
| RS9272689 | 32717083 | A  | 0.54 | 0.41 | 0.72 | 2.18E-05 |
| RS765649  | 29939037 | T  | 0.47 | 0.33 | 0.67 | 2.90E-05 |
| RS6926336 | 32515300 | G  | 3.55 | 1.95 | 6.44 | 3.19E-05 |
| RS1611717 | 29937556 | A  | 0.48 | 0.34 | 0.68 | 3.32E-05 |
| RS9258651 | 29930334 | G  | 0.48 | 0.34 | 0.68 | 3.46E-05 |
| RS2523756 | 29928696 | A  | 0.48 | 0.34 | 0.68 | 3.55E-05 |
| RS3094175 | 29930902 | A  | 0.48 | 0.34 | 0.68 | 3.61E-05 |
| RS1431399 | 33149012 | A  | 0.42 | 0.28 | 0.64 | 3.85E-05 |
| RS1611737 | 29939550 | C  | 0.48 | 0.34 | 0.68 | 3.94E-05 |
| RS1611710 | 29936895 | G  | 0.48 | 0.34 | 0.68 | 4.13E-05 |
| RS9268644 | 32516022 | A  | 0.44 | 0.29 | 0.65 | 4.69E-05 |
| RS2428510 | 29931006 | G  | 0.49 | 0.34 | 0.69 | 4.74E-05 |

|            |          |   |      |      |      |          |
|------------|----------|---|------|------|------|----------|
| RS6919513  | 29931973 | G | 0.49 | 0.34 | 0.69 | 4.74E-05 |
| RS9258679  | 29932038 | A | 0.49 | 0.34 | 0.69 | 4.74E-05 |
| RS3077     | 33141000 | A | 0.40 | 0.25 | 0.62 | 5.03E-05 |
| RS3129877  | 32516575 | A | 0.44 | 0.29 | 0.65 | 5.13E-05 |
| RS1611732  | 29938987 | G | 0.49 | 0.34 | 0.69 | 5.17E-05 |
| RS1978029  | 32839688 | A | 0.42 | 0.27 | 0.64 | 5.51E-05 |
| RS9276586  | 32840915 | G | 0.42 | 0.27 | 0.64 | 5.51E-05 |
| RS2844827  | 29919216 | A | 0.50 | 0.35 | 0.70 | 5.82E-05 |
| RS9469341  | 33143855 | A | 0.41 | 0.26 | 0.63 | 6.67E-05 |
| RS1611723  | 29938484 | A | 0.50 | 0.35 | 0.70 | 7.04E-05 |
| RS2571391  | 30031817 | C | 0.38 | 0.24 | 0.62 | 7.43E-05 |
| RS3129875  | 32515446 | G | 0.48 | 0.33 | 0.69 | 7.86E-05 |
| RS1431400  | 33149154 | G | 0.41 | 0.26 | 0.64 | 7.92E-05 |
| RS10214910 | 33145653 | C | 0.41 | 0.27 | 0.64 | 7.93E-05 |
| RS9348904  | 33148813 | A | 0.42 | 0.27 | 0.64 | 8.15E-05 |
| RS7755224  | 32760295 | G | 2.48 | 1.58 | 3.89 | 8.39E-05 |
| RS4084096  | 29919847 | C | 0.51 | 0.36 | 0.71 | 8.52E-05 |
| RS2395181  | 32515382 | C | 0.49 | 0.34 | 0.70 | 9.46E-05 |
| RS9258766  | 29938390 | G | 0.51 | 0.36 | 0.71 | 9.48E-05 |

---

**Supplementary Table 6:** *HLA-DRB1* data stratified according to genotype of SNP, *rs9271366*, in 89 subjects of the Filipino SLE cohort

| <b>AA HOMs</b> | <b>ALLELES 1&amp;2*</b> | <b>AG HETs</b> | <b>ALLELE 1</b> | <b>ALLELE 2</b> | <b>GG HOMs</b> | <b>ALLELE 1</b>   | <b>ALLELE 2</b>      |
|----------------|-------------------------|----------------|-----------------|-----------------|----------------|-------------------|----------------------|
| case           | 15:02, ---              | case           | 15:02           | 04:05           | case           | 04:01             | 07:01                |
| case           | 15:02, ---              | case           | 15:02           | 14:04           | case           | 07:01             | 12:02                |
| case           | 15:02, ---              | case           | 15:02           | 07:01           | case           | 12:02/20          | 12:02/20             |
| case           | 15:02, ---              | case           | 15:02           | 09:01           | case           | 12:02/20          | 12:02/20             |
| case           | 15:02, ---              | case           | 15:02           | 07:01           | case           | 03:01/20/45/50/51 | 12:02/19             |
| case           | 15:02, ---              | case           | 15:02           | 04:05           | case           | 04:03/52          | 08:03                |
| case           | 15:02, ---              | case           | 15:02           | 08:03           | case           | 12:02             | 07:01                |
| case           | 15:02, ---              | case           | 15:02           | 12:02           | case           | 12:02/19          | 15:01/35/36/41/42/43 |
| case           | 15:02, ---              | case           | 15:02           | 07:01           | case           | 14:04             | 07:01                |
| case           | 15:02, ---              | case           | 15:02           | 12:02           | case           | 04:01             | 12:02                |
| case           | 15:02, ---              | case           | 15:02           | 03:01/34/50/51  | case           | 09:01/02          | 09:01/02             |
| case           | 15:02, ---              | control        | 15:02           | 09:01           | case           | 04:03/52          | 08:03                |
| case           | 15:02, ---              | control        | 15:02           | 12:02           | case           | 04:05             | 12:02                |
| case           | 15:02, ---              | control        | 15:02           | 11:01/75/81     | case           | 04:03/52          | 08:03                |
| case           | 15:02, ---              | control        | 15:02           | 08:03           | control        | 03:01/45/50/51    | 09:01                |
| case           | 15:02, ---              | control        | 15:02           | 12:02           | control        | 04:03/52          | 11:01/81             |
| case           | 15:02, ---              | control        | 15:02           | 12:02           | control        | 08:03             | 09:01                |
| case           | 15:02, ---              | control        | 15:02           | 12:02           | control        | 04:05             | 09:01                |
| case           | 15:02, ---              | control        | 15:02           | 12:02           | control        | 12:02/20          | 12:02/20             |
| case           | 15:02, ---              | control        | 15:02           | 09:01           | control        | 11:01             | 14:07                |
| case           | 15:02, ---              | control        | 15:02           | 16:02           | control        | 12:01/06/10/17    | 10:01                |
| case           | 15:02, ---              | control        | 15:02           | 11:01/75/81     | control        | 04:05/83/89       | 04:05/80/81N/83/89   |
| case           | 15:02, ---              | control        | 15:02           | 10:01           | control        | 04:06             | 12:02                |
| case           | 15:02, ---              | control        | 15:02           | 13:02           | control        | 03:01/45/50/51    | 11:01/75/81          |
| case           | 15:02, ---              |                |                 |                 | control        | 03:01/45/48/50/51 | 1501/36/41/42/43     |
| case           | 15:02, ---              |                |                 |                 | control        | 12:02/20          | 12:02/20             |

|         |            |
|---------|------------|
| case    | 15:02, --- |
| control | 15:02, --- |

---

The associated minor allele is A, the major allele is G

\* all samples are homozygous for *HLA-DRB1\*15:02*, some sample are homozygous for the string *HLA-DRB1\*15:01/02/08*, however as the alleles *HLA-DRB1\*15:01* and *HLA-DRB1\*15:08* are rare in this cohort, the most likely genotype is homozygous *HLA-DRB1\*15:02*

**Supplementary Figure 3:** Linkage disequilibrium between top independent MHC SNPs and *HLA-DRB1* alleles in Filipino controls

(a)  $D'$  plot

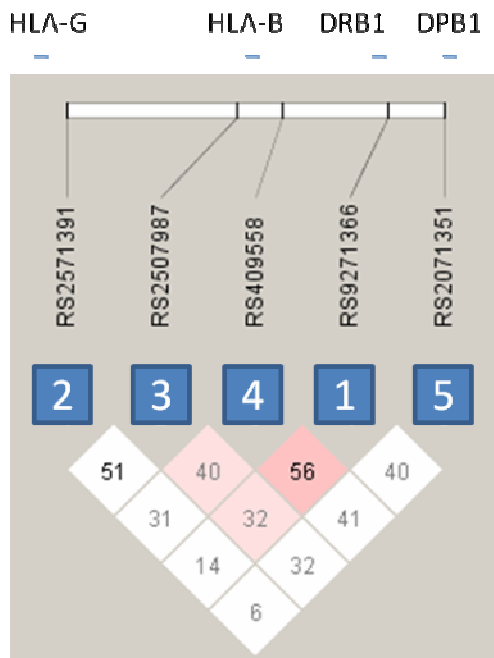

(b)  $r^2$  plot

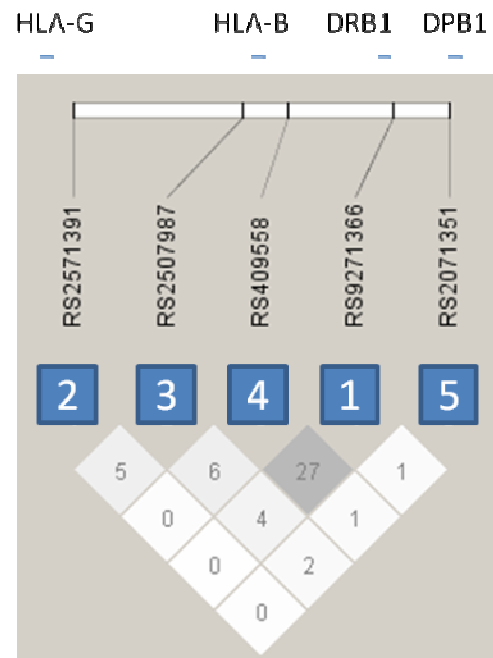

**Supplementary Table 7:** Association of SNP, rs9271366, in UK, Spanish and Filipino SLE

|                 | UK SLE |                  |           | Spanish SLE |                  |       | Filipino SLE |                  |           | All       |
|-----------------|--------|------------------|-----------|-------------|------------------|-------|--------------|------------------|-----------|-----------|
|                 | F_U    | OR (95% CI)      | P         | F_U         | OR (95% CI)      | P     | F_U          | OR (95% CI)      | P         | BD P      |
| Primary SMA     | 0.11   | 1.32 (1.04-1.66) | 0.021     | 0.10        | 1.48 (1.09-2.01) | 0.012 | 0.34         | 2.46 (1.83-3.30) | 1.97x10-9 | 5.25x10-4 |
| Conditional SMA | -      | 1.63 (1.28-2.07) | 7.79x10-5 | -           | 1.55 (1.13-2.11) | 0.006 | -            | NA               | NA        | -         |

F\_U, frequency in unaffected controls; OR, odds ratio; CI, confidence interval; P, univariate or conditional p-value; BD P, Breslow-Day p value; SMA, single marker association

**Supplementary Table 8:** Haplotypic association between MHC region SNPs in (a) United Kingdom, (b) Spanish and (c) Filipino SLE

**(a) United Kingdom SLE**

| SNP1             | SNP2             | SNP3             | HAPLOTYPE  | F_A              | F_U              | OR          | 95% CI           | P               |
|------------------|------------------|------------------|------------|------------------|------------------|-------------|------------------|-----------------|
| <b>RS1269852</b> | <b>RS3906272</b> | <b>RS3129868</b> | <b>CAT</b> | <b>0.000</b>     | <b>0.000</b>     | <b>NA</b>   | <b>NA</b>        | <b>NA</b>       |
| RS1269852        | RS3906272        | RS3129868        | GAT        | 0.016            | 0.007            | NA          | NA               | NA              |
| <b>RS1269852</b> | <b>RS3906272</b> | <b>RS3129868</b> | <b>CGT</b> | <b>&lt;0.001</b> | <b>0.000</b>     | <b>NA</b>   | <b>NA</b>        | <b>NA</b>       |
| RS1269852        | RS3906272        | RS3129868        | GGT        | 0.123            | 0.106            | 1.2         | 0.93-1.54        | 0.15            |
| <b>RS1269852</b> | <b>RS3906272</b> | <b>RS3129868</b> | <b>CAG</b> | <b>0.004</b>     | <b>0.001</b>     | <b>NA</b>   | <b>NA</b>        | <b>NA</b>       |
| RS1269852        | RS3906272        | RS3129868        | GAG        | 0.091            | 0.048            | 2.26        | 1.60-3.18        | 3.07E-06        |
| RS1269852        | RS3906272        | RS3129868        | CGG        | 0.239            | 0.109            | 2.71        | 2.17-3.78        | 8.37E-19        |
| <b>RS1269852</b> | <b>RS3906272</b> | <b>RS3129868</b> | <b>GGG</b> | <b>0.524</b>     | <b>0.729</b>     | <b>0.37</b> | <b>0.31-0.44</b> | <b>3.72E-28</b> |
|                  | <b>RS3906272</b> | <b>RS3129868</b> | <b>AT</b>  | <b>0.017</b>     | <b>0.006</b>     | <b>NA</b>   | <b>NA</b>        | <b>NA</b>       |
|                  | RS3906272        | RS3129868        | GT         | 0.129            | 0.105            | 1.25        | 0.97-1.61        | 0.08            |
|                  | RS3906272        | RS3129868        | AG         | 0.097            | 0.045            | 2.35        | 1.64-3.36        | 2.81E-06        |
|                  | <b>RS3906272</b> | <b>RS3129868</b> | <b>GG</b>  | <b>0.757</b>     | <b>0.844</b>     | <b>0.59</b> | <b>0.47-0.72</b> | <b>6.52E-07</b> |
| <b>RS1269852</b> |                  | <b>RS3129868</b> | <b>CT</b>  | <b>0.004</b>     | <b>&lt;0.001</b> | <b>NA</b>   | <b>NA</b>        | <b>NA</b>       |
| RS1269852        |                  | RS3129868        | GT         | 0.141            | 0.111            | 1.29        | 1.02-1.48        | 0.03            |
| RS1269852        |                  | RS3129868        | CG         | 0.247            | 0.109            | 2.74        | 2.18-3.44        | 2.96E-18        |
| <b>RS1269852</b> |                  | <b>RS3129868</b> | <b>GG</b>  | <b>0.608</b>     | <b>0.779</b>     | <b>0.44</b> | <b>0.37-0.53</b> | <b>7.94E-19</b> |
| <b>RS1269852</b> | <b>RS3906272</b> |                  | <b>CA</b>  | <b>0.004</b>     | <b>&lt;0.001</b> | <b>NA</b>   | <b>NA</b>        | <b>NA</b>       |
| RS1269852        | RS3906272        |                  | GA         | 0.108            | 0.049            | 2.37        | 1.72-3.27        | 1.59E-07        |
| RS1269852        | RS3906272        |                  | CG         | 0.242            | 0.120            | 2.42        | 1.93-3.03        | 1.48E-14        |
| <b>RS1269852</b> | <b>RS3906272</b> |                  | <b>GG</b>  | <b>0.646</b>     | <b>0.830</b>     | <b>0.36</b> | <b>0.29-0.44</b> | <b>1.23E-23</b> |
| RS1269852        |                  |                  | C (G)      |                  | 0.110            | 2.68        | 2.16-3.33        | 2.48E-19        |
|                  | RS3906272        |                  | A (G)      |                  | 0.040            | 2.84        | 2.05-3.92        | 2.95E-10        |
|                  |                  | RS3129868        | T (G)      |                  | 0.110            | 1.67        | 1.29-2.14        | 8.65E-05        |

**(b) Spanish SLE**

| SNP1             | SNP2             | SNP3             | HAPLOTYPE  | F_A          | F_U          | OR          | 95% CI           | P               |
|------------------|------------------|------------------|------------|--------------|--------------|-------------|------------------|-----------------|
| <b>RS3130490</b> | <b>RS3129768</b> | <b>RS3117213</b> | <b>ACA</b> | <b>0.004</b> | <b>0.000</b> | <b>NA</b>   | <b>NA</b>        | <b>NA</b>       |
| RS3130490        | RS3129768        | RS3117213        | CCA        | 0.048        | 0.021        | 2.46        | 1.16-5.21        | 0.02            |
| RS3130490        | RS3129768        | RS3117213        | AAA        | 0.048        | 0.014        | 3.86        | 2.10-7.08        | 1.27E-05        |
| RS3130490        | RS3129768        | RS3117213        | CAA        | 0.190        | 0.142        | 1.39        | 1.07-1.80        | 0.01            |
| <b>RS3130490</b> | <b>RS3129768</b> | <b>RS3117213</b> | <b>ACC</b> | <b>0.013</b> | <b>0.001</b> | <b>NA</b>   | <b>NA</b>        | <b>NA</b>       |
| RS3130490        | RS3129768        | RS3117213        | CCC        | 0.143        | 0.107        | 1.65        | 1.23-2.21        | 7.12E-04        |
| RS3130490        | RS3129768        | RS3117213        | AAC        | 0.048        | 0.027        | 1.97        | 1.12-3.47        | 0.02            |
| <b>RS3130490</b> | <b>RS3129768</b> | <b>RS3117213</b> | <b>CAC</b> | <b>0.506</b> | <b>0.688</b> | <b>0.47</b> | <b>0.38-0.58</b> | <b>3.29E-13</b> |
| <b>RS3130490</b> | <b>RS3129768</b> |                  | <b>AC</b>  | <b>0.017</b> | <b>0.001</b> | <b>NA</b>   | <b>NA</b>        | <b>NA</b>       |
| RS3130490        | RS3129768        |                  | CC         | 0.193        | 0.128        | 1.78        | 1.36-2.38        | 3.50E-05        |
| RS3130490        | RS3129768        |                  | AA         | 0.097        | 0.041        | 2.9         | 1.91-4.42        | 6.88E-07        |
| <b>RS3130490</b> | <b>RS3129768</b> |                  | <b>CA</b>  | <b>0.693</b> | <b>0.830</b> | <b>0.45</b> | <b>0.35-0.57</b> | <b>8.80E-11</b> |
| <b>RS3130490</b> |                  | <b>RS3117213</b> | <b>AA</b>  | <b>0.053</b> | <b>0.014</b> | <b>3.95</b> | <b>2.16-7.23</b> | <b>8.74E-06</b> |
| RS3130490        |                  | RS3117213        | CA         | 0.238        | 0.164        | 1.49        | 1.16-1.91        | 1.65E-03        |
| RS3130490        |                  | RS3117213        | AC         | 0.061        | 0.027        | 1.99        | 1.14-3.46        | 0.02            |
| <b>RS3130490</b> |                  | <b>RS3117213</b> | <b>CC</b>  | <b>0.649</b> | <b>0.795</b> | <b>0.48</b> | <b>0.38-0.61</b> | <b>2.13E-09</b> |
|                  | <b>RS3129768</b> | <b>RS3117213</b> | <b>CA</b>  | <b>0.053</b> | <b>0.020</b> | <b>2.57</b> | <b>1.22-5.42</b> | <b>1.34E-02</b> |
|                  | RS3129768        | RS3117213        | AA         | 0.237        | 0.157        | 1.75        | 1.37-2.24        | 9.58E-06        |
|                  | RS3129768        | RS3117213        | CC         | 0.156        | 0.109        | 1.67        | 1.25-2.23        | 5.59E-04        |
|                  | <b>RS3129768</b> | <b>RS3117213</b> | <b>AC</b>  | <b>0.553</b> | <b>0.714</b> | <b>0.51</b> | <b>0.42-0.62</b> | <b>6.43E-11</b> |
| RS3130490        |                  |                  | A (C)      |              | 0.04         | 2.96        | 1.95-4.51        | 3.94E-07        |
|                  | RS3129768        |                  | C (A)      |              | 0.13         | 1.91        | 1.44-2.53        | 7.57E-06        |
|                  |                  | RS3117213        | A (C)      |              | 0.18         | 1.76        | 1.37-2.25        | 7.18E-06        |



### (c) Filipino SLE

| SNP1             | SNP2             | SNP3             | HAPLOTYPE  | F_A          | F_U          | OR           | 95% CI             | P               |
|------------------|------------------|------------------|------------|--------------|--------------|--------------|--------------------|-----------------|
| RS9271366        | RS2571391        | RS2507987        | GCA        | 0.017        | 0.019        | 0.84         | 0.20-3.56          | 0.82            |
| <b>RS9271366</b> | <b>RS2571391</b> | <b>RS2507987</b> | <b>ACA</b> | <b>0.005</b> | <b>0.031</b> | <b>0.002</b> | <b>0.0001-0.06</b> | <b>2.10E-04</b> |
| RS9271366        | RS2571391        | RS2507987        | GAA        | 0.262        | 0.201        | 1.48         | 1.04-2.11          | 0.03            |
| <b>RS9271366</b> | <b>RS2571391</b> | <b>RS2507987</b> | <b>AAA</b> | <b>0.150</b> | <b>0.271</b> | <b>0.44</b>  | <b>0.30-0.63</b>   | <b>1.14E-05</b> |
| RS9271366        | RS2571391        | RS2507987        | GCT        | 0.029        | 0.029        | 1.05         | 0.31-3.59          | 0.94            |
| <b>RS9271366</b> | <b>RS2571391</b> | <b>RS2507987</b> | <b>ACT</b> | <b>0.026</b> | <b>0.084</b> | <b>0.14</b>  | <b>0.06-0.33</b>   | <b>5.45E-06</b> |
| <b>RS9271366</b> | <b>RS2571391</b> | <b>RS2507987</b> | <b>GAT</b> | <b>0.273</b> | <b>0.092</b> | <b>3.45</b>  | <b>2.24-5.33</b>   | <b>5.69E-11</b> |
| RS9271366        | RS2571391        | RS2507987        | AAT        | 0.237        | 0.274        | 0.81         | 0.59-1.12          | 0.21            |
| RS9271366        | RS2571391        |                  | GC         | 0.045        | 0.048        | 0.89         | 0.41-1.95          | 0.78            |
| <b>RS9271366</b> | <b>RS2571391</b> |                  | <b>AC</b>  | <b>0.030</b> | <b>0.116</b> | <b>0.14</b>  | <b>0.07-0.29</b>   | <b>1.10E-07</b> |
| <b>RS9271366</b> | <b>RS2571391</b> |                  | <b>GA</b>  | <b>0.528</b> | <b>0.296</b> | <b>2.78</b>  | <b>2.02-3.83</b>   | <b>3.80E-10</b> |
| <b>RS9271366</b> | <b>RS2571391</b> |                  | <b>AA</b>  | <b>0.397</b> | <b>0.539</b> | <b>0.56</b>  | <b>0.42-0.75</b>   | <b>7.37E-05</b> |
|                  | RS2571391        | RS2507987        | CA         | 0.022        | 0.051        | 0.20         | 0.07-0.60          | 3.90E-03        |
|                  | RS2571391        | RS2507987        | AA         | 0.419        | 0.477        | 0.80         | 0.62-1.05          | 0.11            |
|                  | <b>RS2571391</b> | <b>RS2507987</b> | <b>CT</b>  | <b>0.054</b> | <b>0.113</b> | <b>0.34</b>  | <b>0.19-0.62</b>   | <b>3.88E-04</b> |
|                  | <b>RS2571391</b> | <b>RS2507987</b> | <b>AT</b>  | <b>0.505</b> | <b>0.359</b> | <b>1.77</b>  | <b>1.33-2.35</b>   | <b>7.74E-05</b> |
| RS9271366        |                  | RS2507987        | GA         | 0.283        | 0.218        | 1.45         | 1.04-2.03          | 0.03            |
| <b>RS9271366</b> |                  | <b>RS2507987</b> | <b>AA</b>  | <b>0.157</b> | <b>0.307</b> | <b>0.39</b>  | <b>0.27-0.56</b>   | <b>3.30E-07</b> |
| <b>RS9271366</b> |                  | <b>RS2507987</b> | <b>GT</b>  | <b>0.300</b> | <b>0.118</b> | <b>4.35</b>  | <b>2.73-6.93</b>   | <b>6.16E-10</b> |
| RS9271366        |                  | RS2507987        | AT         | 0.260        | 0.358        | 0.63         | 0.46-0.85          | 2.32E-03        |
| RS9271366        |                  |                  | G (A)      |              | 0.340        | 2.46         | 1.83-3.30          | 1.97E-09        |
|                  | RS2571391        |                  | C (A)      |              | 0.160        | 0.36         | 0.22-0.59          | 6.06E-05        |
|                  |                  | RS2507987        | A (T)      |              | 0.480        | 0.48         | 0.35-0.66          | 6.80E-06        |

F\_A, frequency in affected SLE cases; F\_U, frequency in unaffected controls; OR, odds ratio; CI, confidence interval; P, nominal p-value; Allele in parenthesis is the unassociated allele in the primary single marker analysis.

### Logistic regression interaction and haplotype analysis of top three independent Spanish SNPs

A multiple logistic regression model was fitted with rs3130490, rs3129768 and rs3117213 as explanatory variables. All three SNPs had significant effects ( $1.45 \times 10^{-06}$ ,  $4.04 \times 10^{-06}$  and  $7.28 \times 10^{-06}$  respectively) with odds ratios of 2.90 (95% CI 1.88-4.48), 1.95 (95% CI 1.47-2.59) and 1.75 (95% CI 1.37-2.24).

Testing for all three 2x2 interaction effects resulted in a significant ( $p=0.03$ , unadjusted) interaction for rs3130490\*rs3129768 where the effect on the odds ratio was positive = 5.1 (95% CI 1.12-23.08). While the raw p-value for this interaction does not withstand a multiple testing adjustment (for the three interaction terms tested), a further analysis looking at all possible models and evaluating using the AIC showed that the model with rs3130490\*rs3129768 plus an independent additive term for rs3117213 had the lowest AIC (1017.3). The multiple regression model with three additive terms had AIC=1022.1, while an interaction model with only rs3130490\*rs3129768 had AIC=1040.6 and the null model (no markers in the model) had AIC=1101.3.

Evaluated using the BIC, we get the 'rs3130490\*rs3129768 plus rs3117213' model has BIC =1060.6 while the multiple regression model with three additive terms has BIC = 1067.435. This equates to a Bayes Factor of 30 in favour of the 'rs3130490\*rs3129768 plus rs3117213' model.

We also asked whether a haplotype model for rs3130490\*rs3129768 with an independent effect for rs3117213 was a better fit than the interaction model for rs3130490\*rs3129768 with an independent effect for rs3117213. To achieve this we phased the data using fastPHASE and coded the four haplotypes for rs3130490\*rs3129768 as variables (we counted the observed number of haplotypes - 0, 1, 2). We then fitted the following three models:

- 1) interaction model for rs3130490\*rs3129768 with an independent effect for rs3117213
- 2) Protective haplotype for rs3130490\*rs3129768 (CA) with an independent effect for rs3117213
- 3) Four haplotypes for rs3130490\*rs3129768 (protective used as baseline) with an independent effect for rs3117213

Model -1 has five parameters (intercept + rs3130490 + rs3129768 + rs3130490\*rs3129768 + rs3117213), model-2 has three parameters (intercept+protective haplotype+ rs3117213) and model-3 has five parameters(intercept+ 3-non-baseline-haplotypes + rs3117213). We judged the fit of each model by the Akaike Information Criterion (AIC) and the Bayesian Information Criterion (BIC). Model-1 has the lowest AIC and BIC and the difference is >10. Supplementary Table 7 contains these model choice results. We also present the AIC and BIC for the simple 3-snp additive model and the null model (no SNPs included).

|         | AIC           | BIC           | Model Details                             |
|---------|---------------|---------------|-------------------------------------------|
| Model-1 | <b>1017.3</b> | <b>1060.6</b> | rs3130490*rs312976 + rs3117213            |
| Model-2 | 1032.8        | 1080.2        | H(CA) + rs3117213                         |
| Model-3 | 1033.4        | 1076.8        | H(CA) + H(CC) + H(AA) + H(AC) + rs3117213 |
| Model-4 | 1022.1        | 1067.4        | rs3130490 + rs312976 + rs3117213          |
| Model-5 | 1101.3        | 1152.6        | Null                                      |

**Supplementary Table 9:** Model choice assessment for top three independently associated Spanish SNPs

Model-1, which has an interaction between rs3130490\*rs312976 and an additive effect for rs3117213 has the lowest AIC and BIC. For the haplotype models, H(CA) is a variable with values of 0, 1 or 2 if an individual has 0,1 or 2 copies of the haplotype CA. In model 3 the four haplotypes over determine the model, so we set H(AC) as the baseline.

For a graphical representation of the interaction between rs3130490\*rs3129768, see Supplementary Figure 4, where the change in risk for rs3129768 is shown to increase greatly between homozygous and heterozygous individuals for rs3130490. We do not show the points for individuals homozygous for the risk rs3130490 allele as they were very close or equal to 1. In fact an interaction model for rs3130490\*rs3129768 with rs3130490 as a dominant term (still with an independent additive effect for rs3117213) could also be fitted (AIC=1019.0, OR for rs3129768 when baseline for rs3130490 = 1.75, OR for rs3129768 when rs3130490 has 1-or-2 risk alleles = 9.92

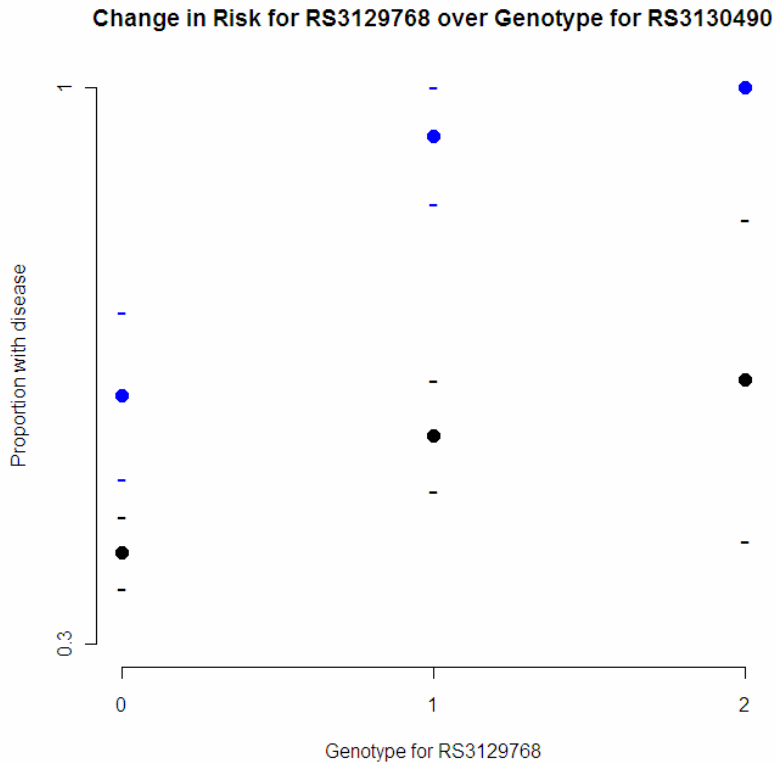

**Supplementary Figure 4:** Interaction between rs3129768 and rs3130490: plot of disease risk over genotypes

Black points represent individuals homozygous for the non-risk rs3130490 allele, while the blue points denote individuals heterozygous for rs3130490. The relative risk over rs3129768 changes between the black (OR=1.76) and blue (OR=9.49) points ( $p=0.03$  for change in regression coefficient). Points for individuals homozygous for the risk rs3130490 allele are not shown as they were very close or equal to 1.

## References

1. de Bakker PI, McVean G, Sabeti PC, et al. A high-resolution HLA and SNP haplotype map for disease association studies in the extended human MHC. *Nat Genet* 2006;38:1166-72.
2. Leslie S, Donnelly P, McVean G. A statistical method for predicting classical HLA alleles from SNP data. *Am J Hum Genet* 2008;82:48-56.
3. Horton R, Gibson R, Coggill P, et al. Variation analysis and gene annotation of eight MHC haplotypes: the MHC Haplotype Project. *Immunogenetics* 2008;60:1-18.
4. Fernando MM, Stevens CR, Sabeti PC, et al. Identification of Two Independent Risk Factors for Lupus within the MHC in United Kingdom Families. *PLoS Genet* 2007;3:e192.
5. Barcellos LF, May SL, Ramsay PP, et al. High-density SNP screening of the major histocompatibility complex in systemic lupus erythematosus demonstrates strong evidence for independent susceptibility regions. *PLoS Genet* 2009;5:e1000696.
6. Graham RR, Ortmann WA, Langefeld CD, et al. Visualizing human leukocyte antigen class II risk haplotypes in human systemic lupus erythematosus. *Am J Hum Genet* 2002;71:543-53.
